# Supplementary material for: Alkali metal-mediated interfacial charge redistribution toward near-optimal water oxidation
Source: Royal Society of Chemistry journal article supplement (doi:10.1039/d2ta04736e), 2022-01-01
Supplement: d2ta04736e1.pdf [file d2ta04736e1.pdf]

## Supplementary Information

### Alkali Metal-Mediated Interfacial Charge Redistribution Toward Near-Optimal Water Oxidation

Ungsoo Kim,<sup>‡a</sup> Sangjin Lee,<sup>‡b</sup> Nam Khen Oh,<sup>‡a</sup> Jihyung Seo,<sup>a</sup> Ji Hoo Cha,<sup>a</sup> Junghyun Lee,<sup>a</sup> Seong-hun Lee,<sup>c</sup> Tae Joo Shin,<sup>cd</sup> Jeong Min Baik,<sup>\*ef</sup> Young-Kyu Han,<sup>\*b</sup> and Hyesung Park<sup>\*ad</sup>

<sup>a</sup>Department of Materials Science and Engineering, Low Dimensional Carbon Materials Center, Ulsan National Institute of Science and Technology, Ulsan 44919, Republic of Korea

<sup>b</sup>Department of Energy and Materials Engineering, Dongguk University-Seoul, Seoul 04620, Republic of Korea

<sup>c</sup>UNIST Central Research Facilities, Ulsan National Institute of Science and Technology (UNIST), Ulsan 44919, Republic of Korea

<sup>d</sup>Graduate School of Semiconductor Materials and Devices Engineering, Ulsan National Institute of Science and Technology (UNIST), Ulsan 44919, Republic of Korea

<sup>e</sup>School of Advanced Materials Science and Engineering, Sungkyunkwan University (SKKU), Suwon 16419, Republic of Korea

<sup>f</sup>KIST-SKKU Carbon-Neutral Research Center, Sungkyunkwan University (SKKU), Suwon 16419, Republic of Korea

\*Corresponding authors

E-mail address: hspark@unist.ac.kr (H. Park), ykenergy@dongguk.edu (Y.-K. Han)  
jbaik97@skku.edu (J. M. Baik)

<sup>‡</sup>These authors contributed equally to this work.

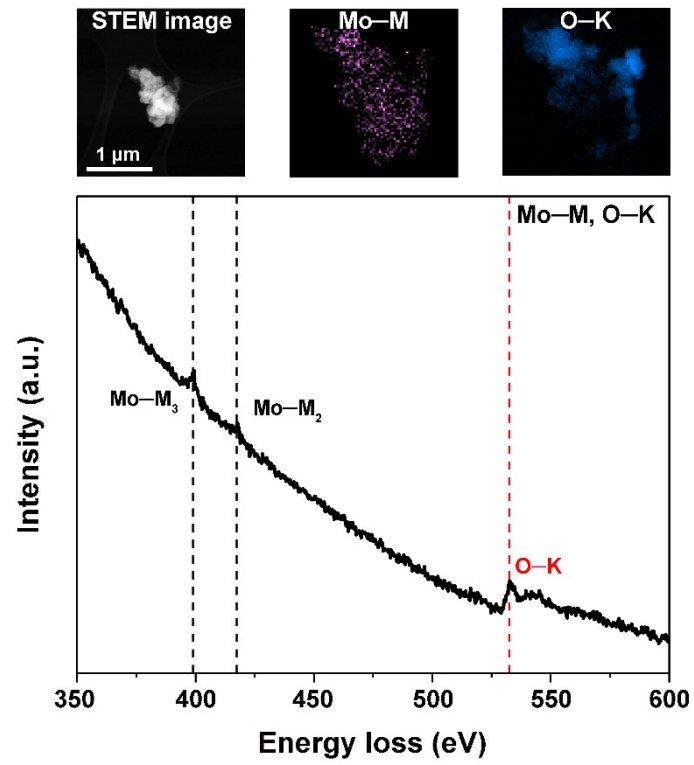

**Fig. S1** EELS spectrum and corresponding chemical map of Mo-M and O-K edges for LSC/LMO.

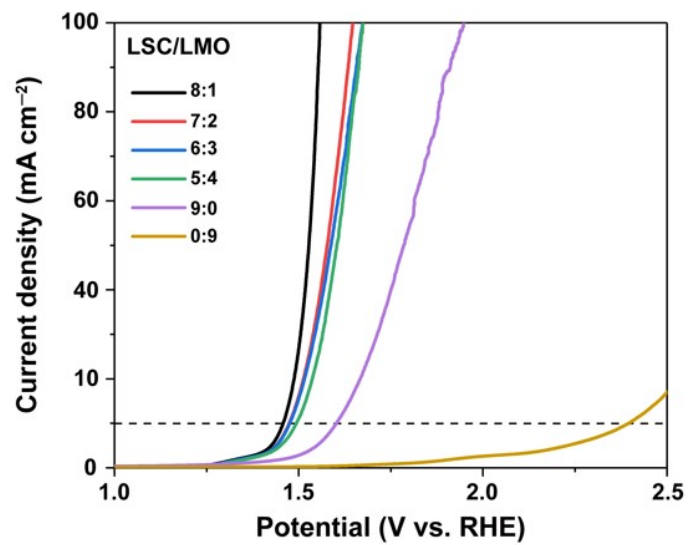

**Fig. S2** OER polarization curves of LSC/LMO with different weight ratios.

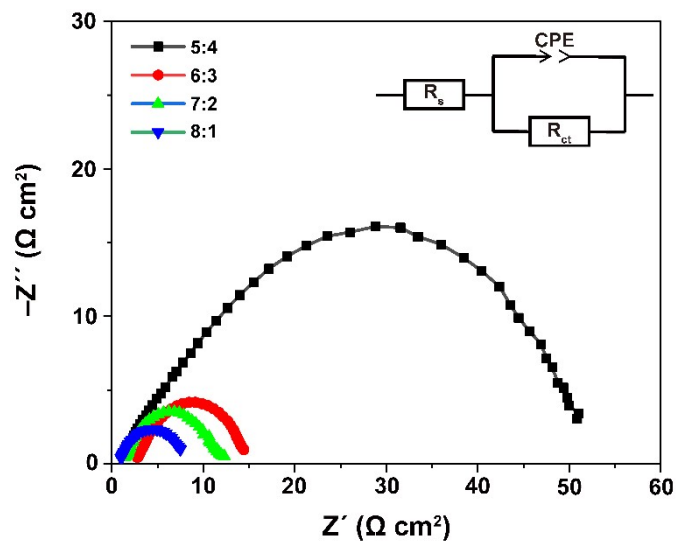

**Fig. S3** Nyquist plots of LSC/LMO for OER with various weight ratios. Inset: Equivalent electrical circuit model used for fitting the Nyquist complex-plane impedance plot.

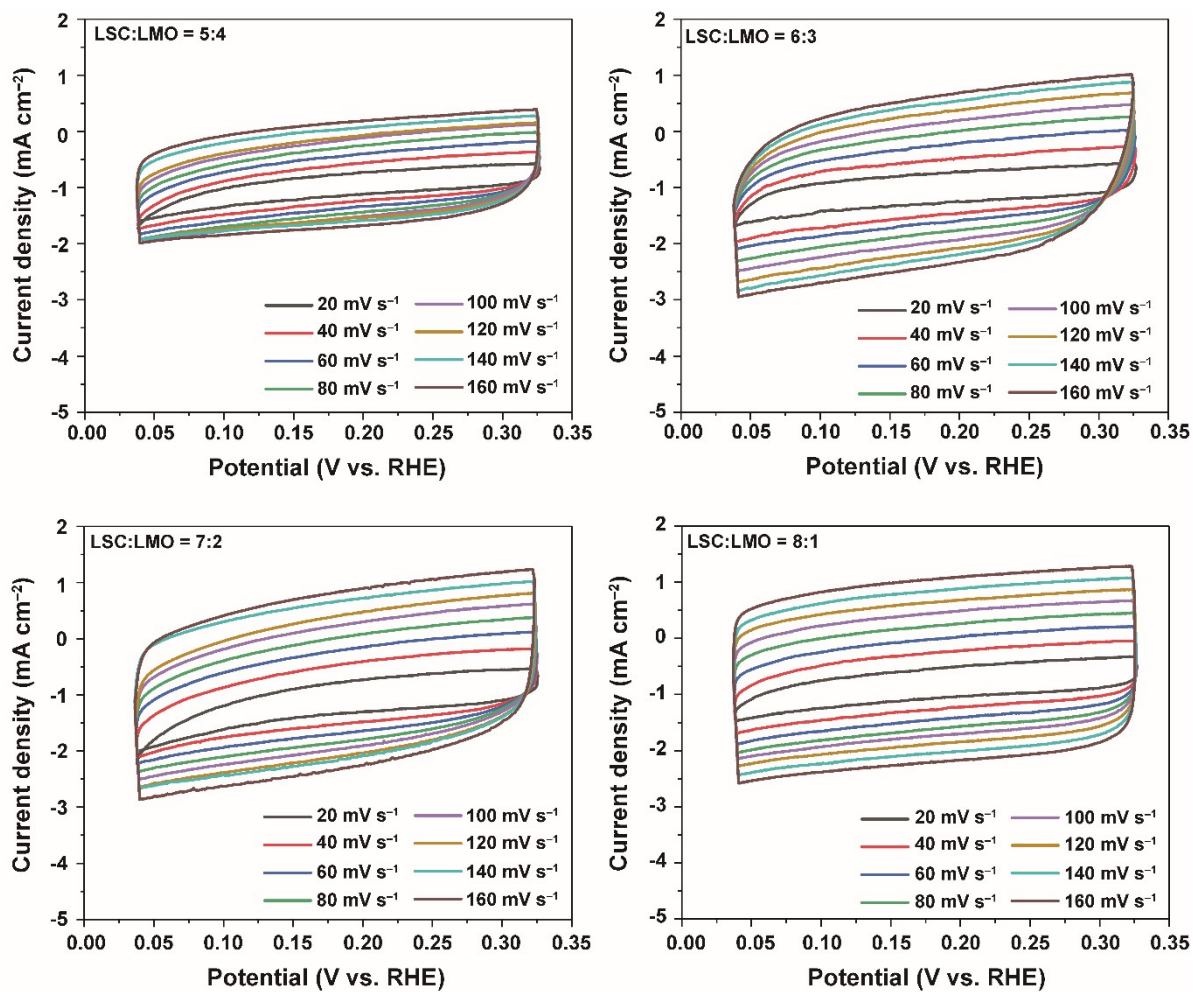

**Fig. S4** Cyclic voltammetry (CV) curve of various weight ratios of LSC/LMO. Each CV curve in the double-layer capacitance region is measured at scan rates from 20 to 160 mV s<sup>-1</sup> with a 20 mV s<sup>-1</sup> interval.

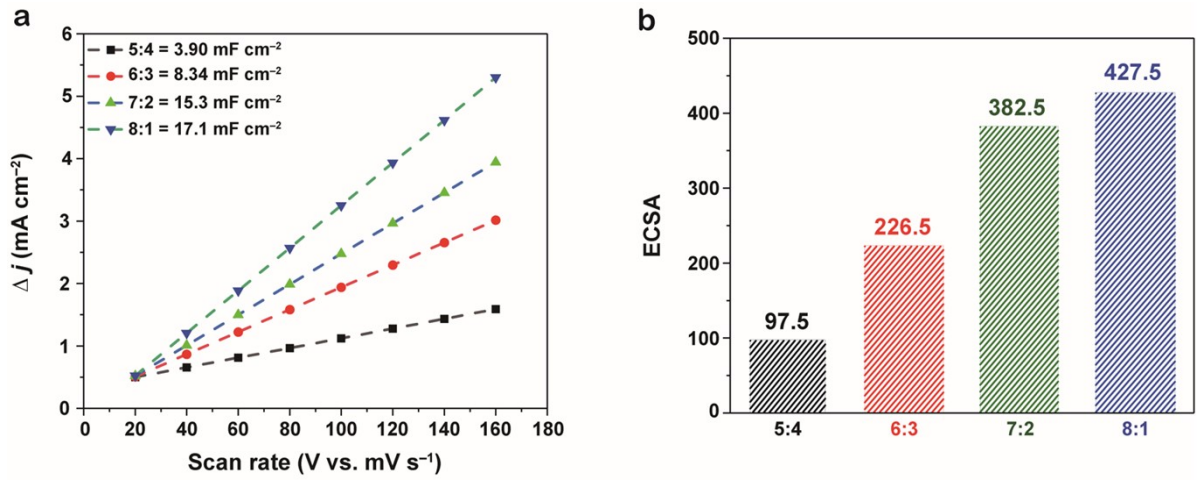

**Fig. S5** (a) Double-layer capacitance values ( $C_{dl}$ ) and (b) ECSA values of LSC/LMO with different weight ratios.

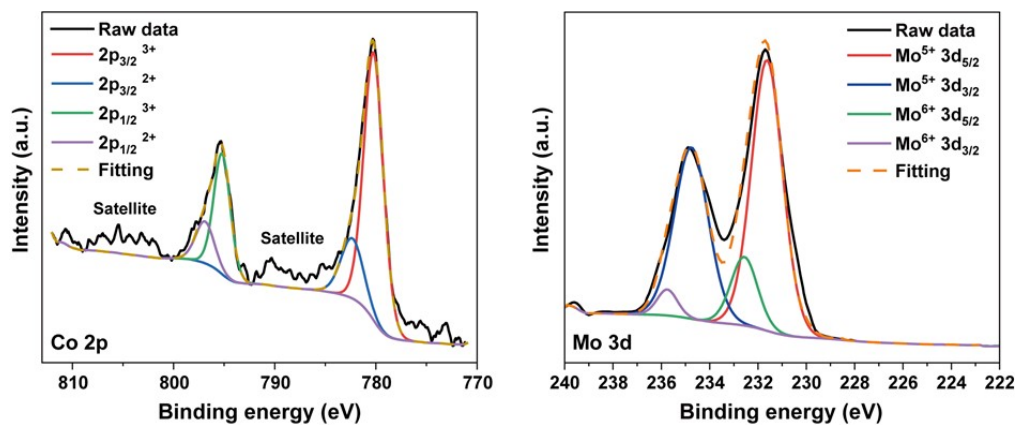

**Fig. S6** High-resolution XPS spectra of Co 2p and Mo 3d of LSC/LMO after the chronoamperometric stability test at  $100 \text{ mA cm}^{-2}$  for 200 h.

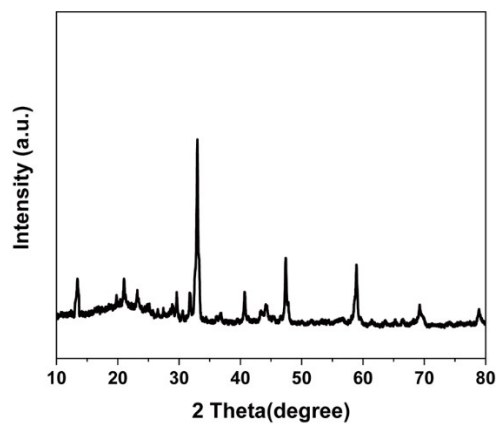

**Fig. S7** XRD spectrum of LSC/LMO after the chronoamperometric stability test at 100 mA  $\text{cm}^{-2}$  for 200 h.



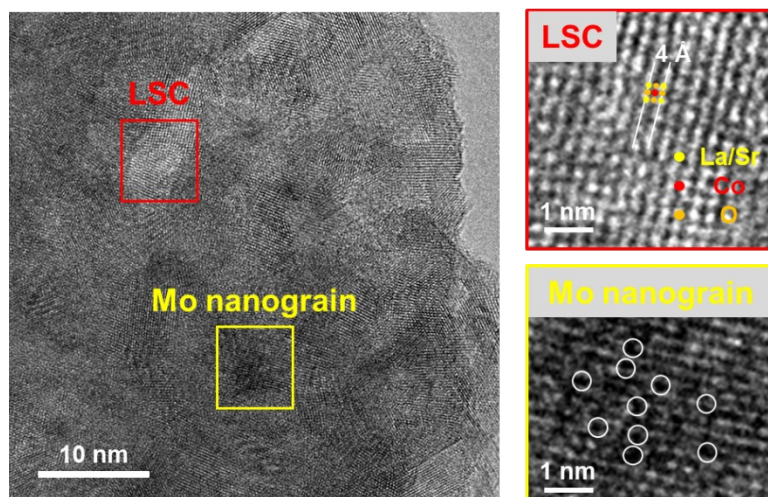

**Fig. S8** TEM and HR-TEM images of LSC/LMO after the chronoamperometric stability test at  $100 \text{ mA cm}^{-2}$  for 200 h. Red and yellow boxes correspond to the domain of LSC and Mo nanograin, respectively.

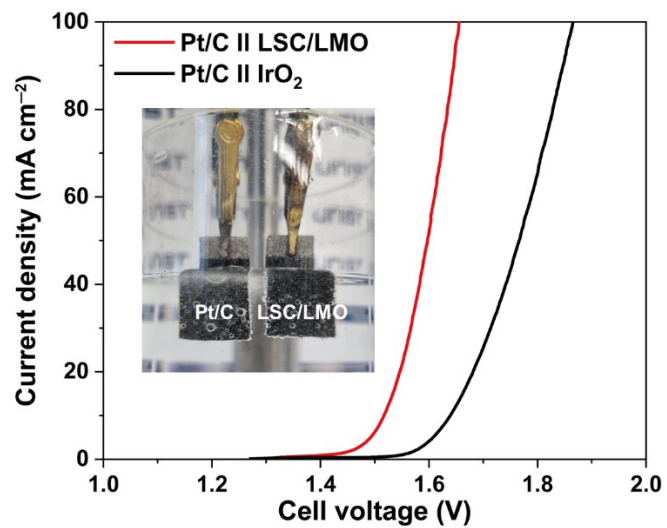

**Fig. S9** Polarization curves for the overall water-splitting. The inset image shows the two electrodes system for the overall water-splitting.

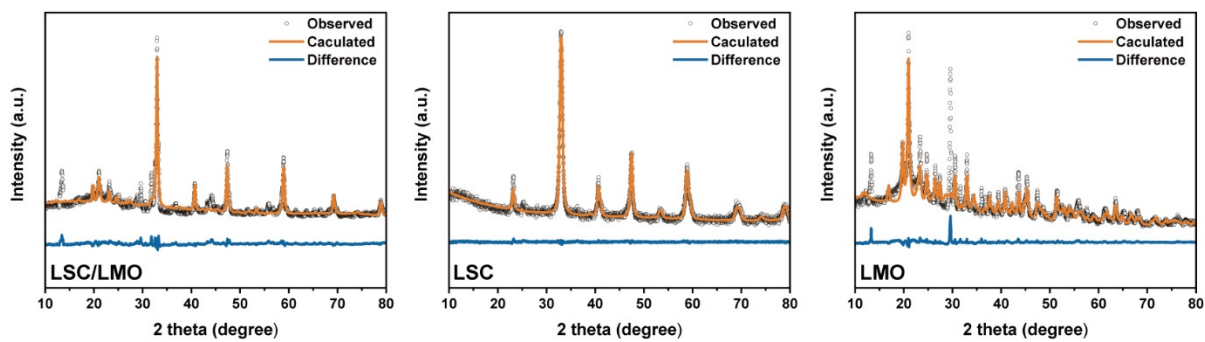

**Fig. S10** Rietveld XRD refinement patterns of LSC/LMO, LSC, and LMO.

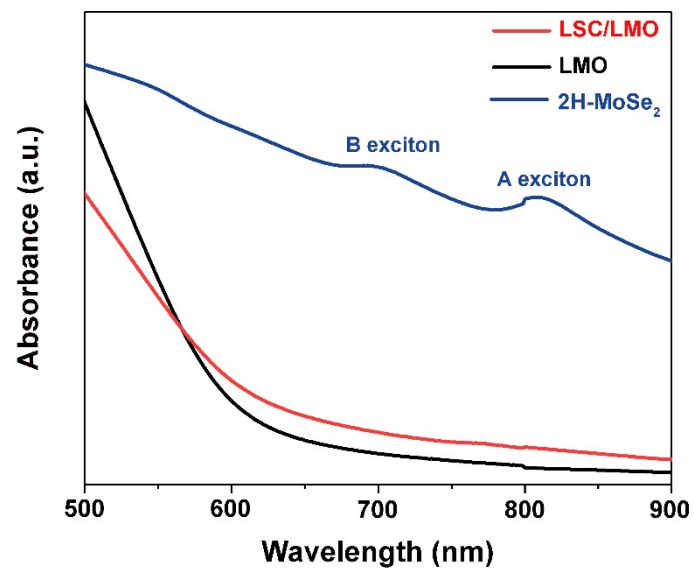

**Fig. S11** UV-Vis-NIR spectra of LSC/LMO, LMO, and 2H-MoSe<sub>2</sub> indicating metallic features of LSC/LMO and LMO.

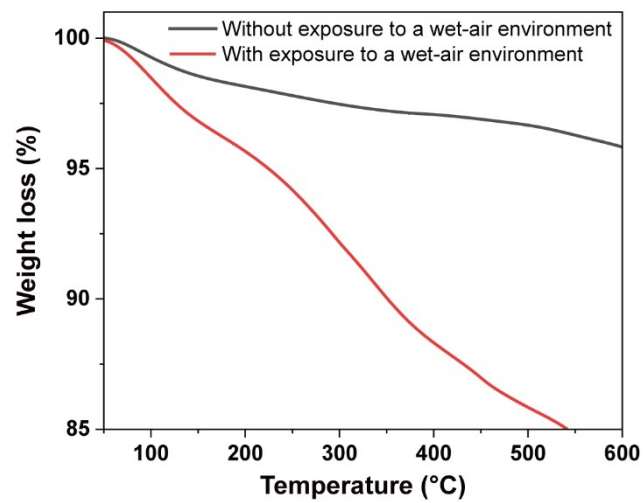

**Fig. S12** TGA profile of LSC/LMO without and with exposure wet-air environment.

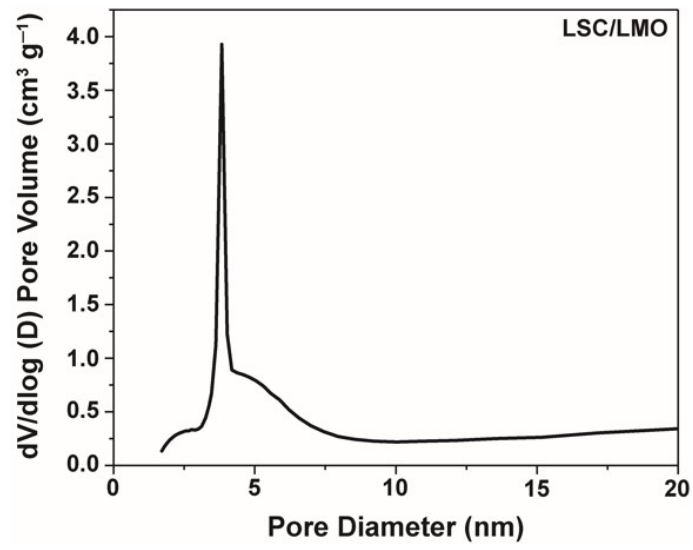

**Fig. S13** Pore size distribution of LSC/LMO calculated from N<sub>2</sub> adsorption isotherms.

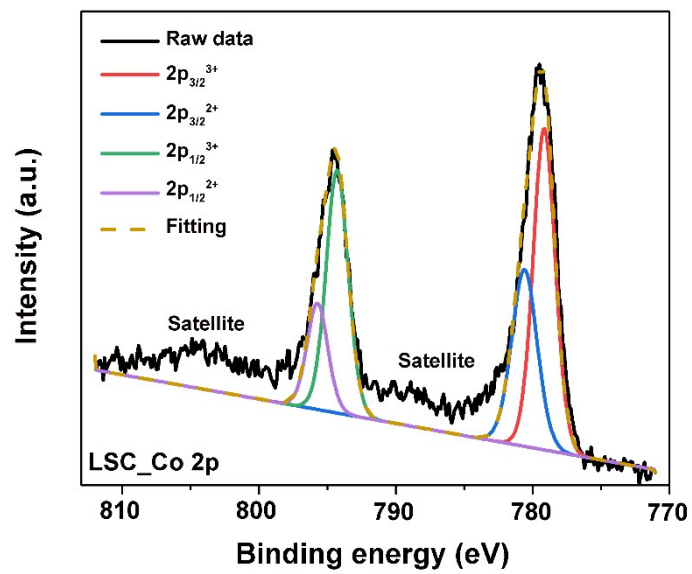

**Fig. S14** High-resolution Co 2p XPS core-level spectrum for LSC.

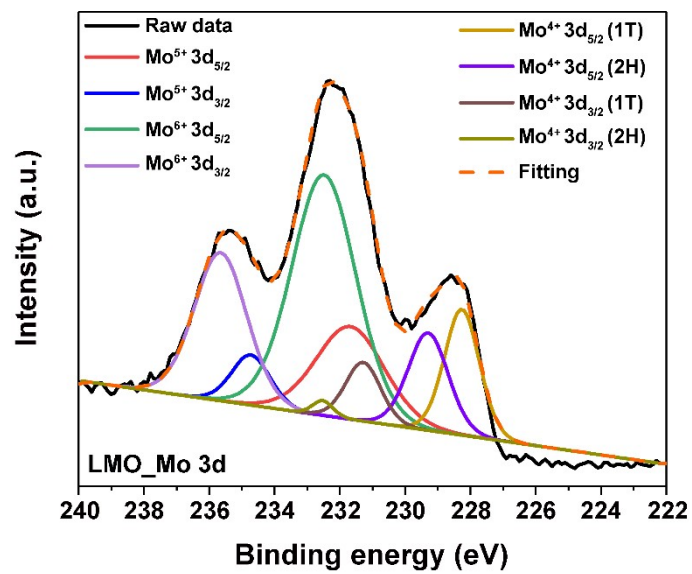

**Fig. S15** High-resolution XPS spectrum of Mo 3d peak for LMO.



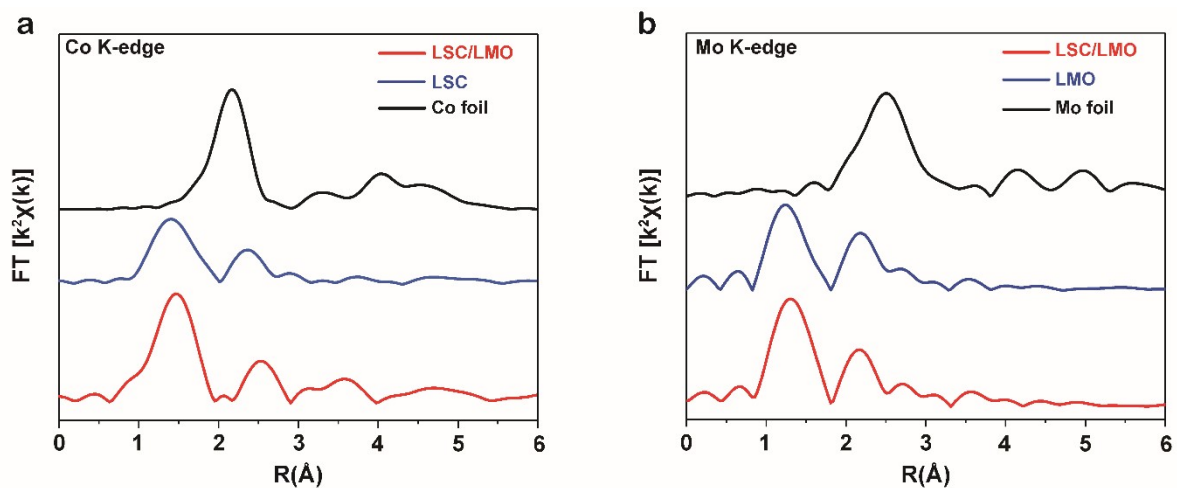

**Fig. S16** Non-phase shifted Fourier transform (FT) EXAFS spectra of (a) Co K-edge of LSC/LMO, LSC, and Co foil and (b) Mo K-edge of LSC/LMO, LMO, and Mo foil.

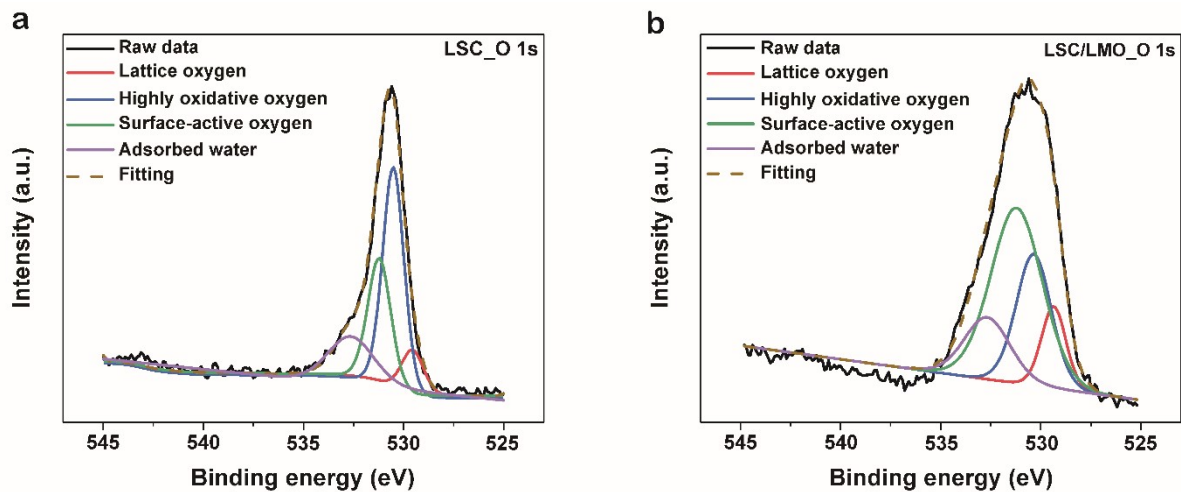

**Fig. S17** High-resolution O 1s XPS core-level spectra for (a) LSC and (b) LSC/LMO.

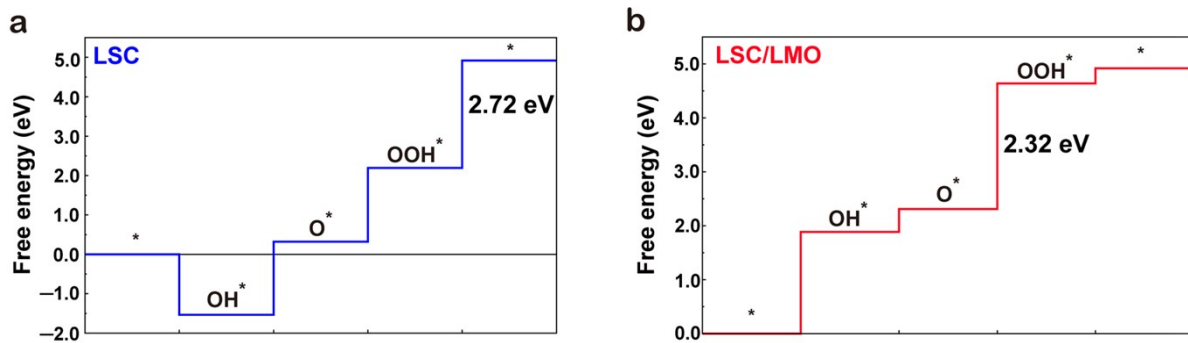

**Fig. S18** Free energy diagrams for (a) LSC and (b) LSC/LMO in adsorbate evolution mechanism.

**Table S1.** Elemental composition of LSC/LMO determine by ICP-OES.

| <b>Element</b> | <b>Weight %</b> | <b>Atomic %</b> |
|----------------|-----------------|-----------------|
| <b>La</b>      | 35.54           | 21.60           |
| <b>Sr</b>      | 24.57           | 23.68           |
| <b>Co</b>      | 35.46           | 50.81           |
| <b>Mo</b>      | 4.43            | 3.91            |
| <b>Se</b>      | 0.0             | 0.0             |
| <b>Total</b>   | 100             | 100             |

**Table S2.** OER overpotential at  $10 \text{ mA cm}^{-2}$  of LSC/LMO with different weight ratios obtained from the OER polarization curve in Fig. S2.

| <b>Weight ratio</b>                                            | 5:4  | 6:3  | 7:2  | 8:1  | 9:0  | 0:9  |
|----------------------------------------------------------------|------|------|------|------|------|------|
| <b>Overpotential at <math>10 \text{ mA cm}^{-2}</math> (V)</b> | 1.49 | 1.48 | 1.47 | 1.45 | 1.60 | 2.39 |

**Table S3.** Charge transfer resistance ( $R_{ct}$ ) of LSC/LMO with various weight ratios obtained from the Nyquist plot analysis in Fig. S3.

| <b>Weight ratio</b>                                           | 5:4   | 6:3   | 7:2   | 8:1  |
|---------------------------------------------------------------|-------|-------|-------|------|
| <b><math>R_{ct}</math> (<math>\Omega \text{ cm}^2</math>)</b> | 48.57 | 11.62 | 10.89 | 6.50 |

**Table S4.** Rietveld refined lattice parameters of LSC/LMO, LSC, and LMO.

| <b>Catalyst</b> | <b>Component</b>                 | <b>Proportion (wt%)</b> | <b>Space group</b> | <b>a (Å)</b> | <b>b (Å)</b> | <b>c (Å)</b> |
|-----------------|----------------------------------|-------------------------|--------------------|--------------|--------------|--------------|
| <b>LSC/LMO</b>  | LSC                              | 78.80                   | Pm3m               | 3.837        | 3.837        | 3.837        |
|                 | Li <sub>2</sub> MoO <sub>4</sub> | 27.20                   | R3                 | 14.337       | 14.337       | 9.589        |
| <b>LSC</b>      | LSC                              | 100                     | Pm3m               | 3.837        | 3.837        | 3.837        |
| <b>LMO</b>      | Li <sub>2</sub> MoO <sub>4</sub> | 79.23                   | R3                 | 14.337       | 14.337       | 9.589        |
|                 | MoO <sub>3</sub>                 | 20.77                   | Pbnm               | 3.962        | 13.858       | 3.697        |

**Table S5.** Summary of the quantification of  $\text{Co}^{3+}/\text{Co}^{2+}$  ratios in LSC and LSC/LMO obtained from the XPS analysis in Fig. 3g and Fig. S14.

|                                             | <b>LSC (atomic %)</b> | <b>LSC/LMO (atomic %)</b> |
|---------------------------------------------|-----------------------|---------------------------|
| <b>Co 2p<sub>3/2</sub>, Co<sup>3+</sup></b> | 61.1                  | 91.1                      |
| <b>Co 2p<sub>3/2</sub>, Co<sup>2+</sup></b> | 38.9                  | 8.9                       |
| <b>Co<sup>3+</sup>/Co<sup>2+</sup></b>      | ca. 1.6               | ca. 10.3                  |



**Table S6.** Summary of the quantification of Mo<sup>4+</sup>, Mo<sup>5+</sup>, and Mo<sup>6+</sup> contents in LMO and LSC/LMO obtained from the XPS analysis in Fig. 3h and Fig. S15.

|                                              | <b>LMO (atomic %)</b> | <b>LSC/LMO (atomic %)</b> |
|----------------------------------------------|-----------------------|---------------------------|
| <b>Mo<sup>4+</sup> 3d<sub>5/2</sub> (1T)</b> | 10.5                  | 2.4                       |
| <b>Mo<sup>4+</sup> 3d<sub>5/2</sub> (2H)</b> | 9.3                   |                           |
| <b>Mo<sup>4+</sup> 3d<sub>3/2</sub> (1T)</b> | 4.9                   |                           |
| <b>Mo<sup>4+</sup> 3d<sub>3/2</sub> (2H)</b> | 0.7                   |                           |
| <b>Mo<sup>5+</sup> 3d<sub>5/2</sub></b>      | 14.9                  | 48.6                      |
| <b>Mo<sup>5+</sup> 3d<sub>3/2</sub></b>      | 4.6                   | 35.9                      |
| <b>Mo<sup>6+</sup> 3d<sub>5/2</sub></b>      | 36.6                  | 11.1                      |
| <b>Mo<sup>6+</sup> 3d<sub>3/2</sub></b>      | 18.5                  | 2.0                       |
| <b>Total</b>                                 | 100                   | 100                       |

**Table S7.** Summary of the quantification of lattice oxygen (AO), highly oxidative oxygen (BO), surface-active oxygen (CO), and adsorbed water (DO) in LSC and LSC/LMO obtained from the XPS analysis in Fig. S17.

|              | <b>LSC (atomic %)</b> | <b>LSC/LMO (atomic %)</b> |
|--------------|-----------------------|---------------------------|
| <b>AO</b>    | 10.1                  | 10.9                      |
| <b>BO</b>    | 50.5                  | 24.9                      |
| <b>CO</b>    | 28.3                  | 48.9                      |
| <b>DO</b>    | 11.1                  | 15.3                      |
| <b>CO/AO</b> | ca. 2.8               | ca. 4.5                   |

**Table S8.** Electrolyte resistance of tested catalysts obtained from the Nyquist plot in Fig. 2c.

| Catalyst         | $R_s$ ( $\Omega \text{ cm}^2$ ) |
|------------------|---------------------------------|
| LSC/LMO          | 1.91                            |
| IrO <sub>2</sub> | 2.82                            |
| LSC              | 4.58                            |
| LMO              | 1.95                            |

## Note S1.

### OER simulations

The Fig. 4c and Fig. S18 show a comparison between lattice oxygen participation mechanism (LOM) and adsorbate evolution mechanism (AEM) for OER free energies in the LSC and LSC/LMO systems. The LOM proceeds with elementary reactions below:

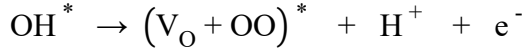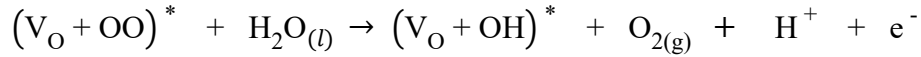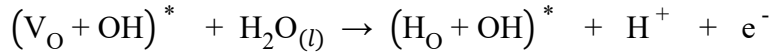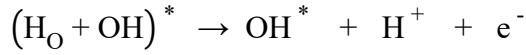

, where OH, V<sub>O</sub>, OO, and H<sub>O</sub> indicate OH adsorbates, oxygen vacancies, OO adsorbates, and hydrogen atoms adsorbed on lattice oxygen, respectively. \* represents that the adsorbates are bound to the LSC (001) surface.

The AEM proceeds with elementary reactions below:

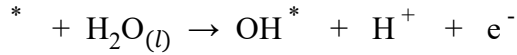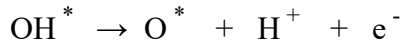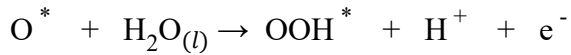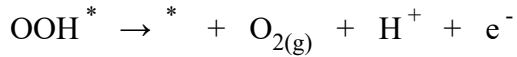

, where OOH indicates OOH adsorbates.
